# Supplementary material for: Ramadan and Diabetes: A Narrative Review and Practice Update
Source: Springer Nature journal article supplement (doi:10.1007/s13300-020-00886-y), 2020-09-09
Supplement: MOESM1 [file 18362048]

## Query Details

[Back to Main Page](#)**1. Kindly check and confirm that ref. 7 is correct.**

Ref 7 is supposed to be the Ramadan review that has been written for the journal and has also been accepted for publication that all the co-authors of this commentary are also authors for the review, which Syed H. Ahmed is the corresponding author for. You will therefore need to put whatever reference that has been generated for this review as Ref 7.

## Commentary

# COVID-19, Diabetes and Ramadan

**Open Access** This article is licensed under a Creative Commons Attribution-NonCommercial 4.0 International License, which permits any non-commercial use, sharing, adaptation, distribution and reproduction in any medium or format, as long as you give appropriate credit to the original author(s) and the source, provide a link to the Creative Commons licence, and indicate if changes were made. The images or other third party material in this article are included in the article's Creative Commons licence, unless indicated otherwise in a credit line to the material. If material is not included in the article's Creative Commons licence and your intended use is not permitted by statutory regulation or exceeds the permitted use, you will need to obtain permission directly from the copyright holder. To view a copy of this licence, visit <http://creativecommons.org/licenses/by-nc/4.0/>.

Tahseen A. Chowdhury, <sup>1</sup>

Salman Waqar, <sup>2</sup>

Sufyan Hussain, <sup>3</sup>

Syed H. Ahmed, <sup>4</sup>

Ateeq Syed, <sup>5</sup>

Ali Karamat, <sup>5</sup>

Ahmed Helmy, <sup>5</sup>

Nazim Ghouri, <sup>6</sup>✉,<sup>7</sup>

Email [nazim.ghouri@glasgow.ac.uk](mailto:nazim.ghouri@glasgow.ac.uk)

- <sup>1</sup> Department of Diabetes and Metabolism, Royal London Hospital, London, UK
- <sup>2</sup> Nuffield Department of Primary Care Health Sciences, University of Oxford, Oxford, UK
- <sup>3</sup> Department of Diabetes and Endocrinology, Guy's and St Thomas' NHS Foundation Trust, London, UK
- <sup>4</sup> Department of Endocrinology and Metabolic Medicine, Countess of Chester Hospital NHS Foundation Trust, Chester, UK
- <sup>5</sup> Department of Diabetes and Endocrinology, University Hospitals Birmingham NHS Foundation Trust, Birmingham, UK
- <sup>6</sup> Institute of Cardiovascular and Medical Sciences, University of Glasgow, Glasgow, UK
- <sup>7</sup> Department of Diabetes and Endocrinology, Elizabeth University Hospital, Glasgow, Queen, UK

Received: 11 June 2020

## Keywords

COVID-19

Fasting

Diabetes

Ramadan

Tahseen A. Chowdhury and Nazim Ghouri are joint senior authors.

---

Coronavirus disease 2019 (COVID-19) caused by the severe acute respiratory syndrome coronavirus-2 (SARS-CoV-2) is a newly emerged disease that has become a global public health emergency and has led to the implementation of extraordinary public health measures throughout the world in a short space of time [1]. At the time of writing, over a quarter of a million deaths have been reported worldwide [2]. Diabetes is a more slowly evolving pandemic, causing 4.2 million deaths worldwide in 2019 [3]. It is estimated that there are currently around 425 million people living with the condition, and a further 352 million with high risk of diabetes from impaired glucose regulation [3].

Type 2 diabetes mellitus (T2DM) affects many Muslims across the world, and a significant number of Muslims with diabetes seek to fast during the month of Ramadan [4]. The fast requires, for those adult Muslims without religiously acknowledged mitigating circumstances (e.g. significant acute or chronic illness and old age), the abstinence from food and water from dawn to dusk, which in the UK, depending on geographical location, is currently between 16~~00~~ and 19~~00~~ hours [in duration](#) [5]. People with diabetes need to take special care during Ramadan as they risk dehydration, hypo- or hyperglycaemia and, if severe, potential physiological decompensation [6]. There are a number of evidence-based and very recent independent, national and international guidelines on the management of diabetes during Ramadan [7, 8, 9]. The present COVID-19 epidemic represents an additional concern for Muslim people with diabetes wishing to fast.

Muslims with any form of diabetes mellitus (DM), particularly T2DM, may be at significant risk of adverse outcomes of COVID-19 for three reasons. Firstly, it is now clear that the presence of T2DM and hypertension are amongst the strongest risk factors for severity of SARS-CoV-2 infection [10, 11, 12]. T2DM as a comorbidity is a significant risk factor for mortality, risk of admission to intensive care, or severity of respiratory disease. This was also seen with previous pandemics (SARS, Middle East respiratory syndrome [MERS], influenza A H1N1) which also showed that the presence of diabetes was an important risk marker for adverse outcomes [13, 14]. Secondly, the presence of central obesity, common amongst Muslim people with diabetes [15], increases risk of adverse outcomes of [COVID-19](#) Reference 18 should be updated as the following -

<https://pubmed.ncbi.nlm.nih.gov/32668401/>, as it is now in peer-reviewed literature ... [16, 17, 18]. Thirdly, there is growing evidence that SARS-CoV-2 infections disproportionately affect people of a Black and Minority Ethnic (BAME) background, and many Muslims are from these high-risk ethnic groups [19, 20].

Therefore, the present pandemic may imply some additional risk for people of Muslim faith with diabetes who plan to fast. So how should they be advised during this period?

All guidelines suggest that people with diabetes who plan to fast should discuss their plan with a healthcare professional who can guide them on their risk [7, 8, 9]. Risk stratification is the cornerstone of advice for people with diabetes, and is based on their co-morbidities, current level of glucose control, and risk of adverse events. Further, recent novel informative guidance from the UK has provided similar advice for patients to include other chronic conditions (including general

and relevant disease-specific guidance relating to COVID-19) [21]; at the time of publication, this has formal endorsement and signposting from respective authoritative associations and bodies including respiratory, renal, gastroenterology, diabetes and as well as the Royal College of General [Practitioners](#). Additional reference after 27 - Waqar S, Ghouri N. Managing Ramadan queries in COVID-19. BJGP Open. 2020;4(2):bjgpopen20X101097. Published 2020 Jun 23. doi:10.3399/bjgpopen20X101097 [22, 23, 24, 25, 26]. People at high risk or very high risk of fasting should be discouraged from doing so and seek alternatives to fasting, particularly during the longer fasts in the summer. These alternatives include delaying fasting until the shorter fasting hours of winter [27], or if a perpetual reason debarring safe fasting exists, then arranging for the feeding of poor people (fidyah) [5, 8]. Patients may wish to speak to a trusted religious authority to discuss these options, if preferred.

Clearly if an individual insists on fasting, they should be supported to do so. Ideally, plans for fasting should be made at least 4–6 weeks before Ramadan, so that careful nutritional advice and medication adjustments can be made, in particular to therapy that may induce hypoglycaemia (insulin or sulfonylurea). The healthcare professional should discuss how they managed their fast the previous year and any changes to medication that were made that year. Attendance at Ramadan-focussed education classes has been proven to improve outcomes of fasting and reduce adverse events, and patients should be encouraged to attend if available [28]. People on medication that may induce hypoglycaemia (insulin or sulfonylureas) should be encouraged to monitor capillary blood or interstitial glucose levels regularly during fasting, and should be advised to break the fast if their glucose levels are below 4.0 mmol/l (5.0 mmol/l if on insulin or a sulfonylurea and driving is necessary) or above 16.7 mmol/l at any time during the fast [5, 8].

So how should advice for Muslims fasting during Ramadan differ this year compared to previous years? During the present COVID-19 pandemic, there is some concern that the risk of dehydration may increase the risk of adverse outcomes of the condition. There is evidence that acute kidney injury (AKI) can lead to significantly poorer outcomes in people with COVID-19 [29]. There is, however, no evidence that fasting or mild dehydration increases risk of developing COVID-19 [30]. Therefore, advice about fasting may be very similar to previous years, but tempered with clear and firm advice about ceasing fasting immediately should the patient develop any symptoms of COVID-19, such as fever, cough, malaise, or [diarrhoea](#). Reference 17 needs to be replaced with reference 21 [17, 30, 31]. The presence of anosmia should make an individual monitor their health very closely and they should cease from fasting immediately if any further deterioration

in health is experienced, even if mild. One of these guidance documents suggests that fasting should cease immediately should anyone in the household develop COVID-19 symptoms [31]. However, our opinion is that if a person with diabetes is in the low/moderate risk category, if they have contact with people with COVID-19, it is probably safe for them to fast providing they can safely isolate and are asymptomatic, but that they should cease fasting should they develop recognised symptoms or become [unwell](#) Reference 17 should actually be replaced with 21 and 30 ... [17].

#### AQ1

Furthermore, if a person with diabetes were to develop COVID-19 symptoms whilst fasting, they should be told to break the fast immediately, hydrate, monitor capillary blood glucose (CBG) regularly, and if becoming more unwell, they should be encouraged to have a plasma ketone check, as there is some evidence that ketosis, and ketoacidosis, is more common amongst people with diabetes and COVID-19 [32]. This particularly applies to patients on sodium glucose transporter 2 inhibitors (SGLT2i) which are rarely reported to cause euglycaemic ketoacidosis [33]. If a patient remains unwell with COVID-19 symptoms, they may require hospital admission as they are at high risk of deterioration. There is guidance to suggest that metformin and SGLT2i should be stopped in all patients with diabetes and suspected COVID-19 who require admission to hospital [34].

A further important point to consider is that recent data suggests that poor glucose control in people with diabetes appears to increase the risk of adverse outcomes of COVID-19 infection [35]. Therefore, improving glucose control in patients with diabetes at this time is important. There is some evidence to suggest that people with stronger religious faith may have better glucose control [36], in which case people with diabetes who fast may elicit some protection from adverse outcomes of COVID-19 infection.

In summary, during the COVID-19 pandemic, Muslims with diabetes who are planning to fast require careful evaluation of their risks of fasting. If they are at high risk of fasting, they should be discouraged from doing so. If they insist on continuing with fasting, then they should be supported to undertake this in the safest manner possible and strongly encouraged to cease fasting should they develop any symptoms of possible COVID-19, seek medical attention should their condition deteriorate, and only resume when well and have discussed this with their supervising clinician.

# Acknowledgements

*Funding* No funding or sponsorship was received for this study or publication of this article.

*Authorship* All named authors meet the International Committee of Medical Journal Editors (ICMJE) criteria for authorship for this article, take responsibility for the integrity of the work as a whole, and have given their approval for this version to be published.

*Authorship Contributions* All authors contributed equally to the manuscript.

*Disclosures* Tahseen A. Chowdhury, Salman Waqar, Sufyan Hussain, Syed H. Ahmed, Ateeq Syed, Ali Karamat, Ahmed Helmy and Nazim Ghouri have nothing to disclose.

*Compliance with Ethics Guidelines* This article is based on previously conducted studies and does not contain any studies with human participants or animals performed by any of the authors.

# References

1. Munster VJ, Koopmans M, van Doremalen N, van Riel D, de Wit E. A novel coronavirus emerging in China—key questions for impact assessment. *N Engl J Med*. 2020;382:692–4. <https://doi.org/10.1056/NEJMp2000929>.
2. Worldometer. COVID-19 coronavirus pandemic. <https://www.worldometers.info/coronavirus/>. Accessed 6 May 2020.
3. International Diabetes Federation. IDF diabetes atlas 8th edition. 2020. <https://www.idf.org/e-library/epidemiology-research/diabetes-atlas/134-idf-diabetes-atlas-8th-edition.html>. Accessed 6 May 2020.
4. International Diabetes Federation. Diabetes and Ramadan. 2020. <https://www.idf.org/our-activities/education/diabetes-and-ramadan.html>. Accessed 6 May 2020.
5. Ghouri N, Hussain S, Mohammed R, et al. Diabetes, driving and fasting during Ramadan: the interplay between secular and religious law. *BMJ Open Diabetes Res Care*. 2018;6:e000520.

6. Salti I, Benard E, Detournay B. A population-based study of diabetes and its characteristics during the fasting month of Ramadan in 13 countries: results of the epidemiology of diabetes and Ramadan 1422/2001 (EPIDIAR) study. *Diabetes Care*. 2004;27:2306–11.
7. Salti I, Bénard E, Detournay B, et al. A population-based study of diabetes and its characteristics during the fasting month of ramadan in 13 countries: results of the epidemiology of diabetes and ramadan 1422/2001 (EPIDIAR) study. *Diabetes Care*. 2004;27: 2306–11.
8. Hassanein M, Al-Arouj M, Hamdy O, et al. Diabetes and Ramadan: Practical guidelines. *Diabetes Res Clin Pract*. 2017;126:303–16. <https://doi.org/10.1016/j.diabres.2017.03.003>.
9. Hanif W, Patel V, Ali SN, et al. The South Asian Health Foundation (UK) guidelines for managing diabetes during Ramadan. *Diabetes Res Clin Pract*. 2020;23:108145. <https://doi.org/10.1016/j.diabres.2020.108145>.
10. Yang J, Zheng Y, Gou X, et al. Prevalence of comorbidities in the novel Wuhan coronavirus (COVID-19) infection: a systematic review and meta-analysis. *Int J Infect Dis*. 2020. <https://doi.org/10.1016/j.ijid.2020.03.017>.
11. Zheng Z, Peng F, Xu B, et al. Risk factors of critical and mortal COVID-19 cases: a systematic literature review and meta-analysis. *J Infect*. 2020;S0163–4453(20):30234–6. <https://doi.org/10.1016/j.jinf.2020.04.021>.
12. Li B, Yang J, Zhao F, et al. Prevalence and impact of cardiovascular metabolic diseases on COVID-19 in China. *Clin Res Cardiol*. 2020. <https://doi.org/10.1007/s00392-020-01626-9>.
13. Yang JK, Feng Y, Yuan MY, et al. Plasma glucose levels and diabetes are independent predictors for mortality and morbidity in patients with SARS. *Diabet Med*. 2006;23:623–8.
14. Wang W, Chen H, Li Q, et al. Fasting plasma glucose is an independent predictor for severity of H1N1 pneumonia. *BMC Infect Dis*. 2011;11:104.
15. Khunti K, Kumar S, Brodie J. Diabetes UK and South Asian Health Foundation recommendations on diabetes research priorities for British South

Asians. Diabetes UK. 2009. [https://www.diabetes.org.uk/resources-s3/2017-11/south\\_asian\\_report.pdf](https://www.diabetes.org.uk/resources-s3/2017-11/south_asian_report.pdf). Accessed 8 May 2020.

16. Sattar N, McInnes IB, McMurray JJV. Obesity a risk factor for severe COVID-19 infection: multiple potential mechanisms. *Circulation*. 2020;142:4–6. <https://doi.org/10.1161/CIRCULATIONAHA.120.047659>.

17. Almond MH, Edwards MR, Barclay WS, Johnston SL. Obesity and susceptibility to severe outcomes following respiratory viral infection. *Thorax*. 2013;68:684–6.

18. Sattar N, Ho FK, Gill JMR, et al. BMI and future risk for COVID-19 infection and death across sex, age and ethnicity: preliminary findings from UK biobank. <https://www.medrxiv.org/content/10.1101/2020.06.05.20122226v2>. Accessed 26 June 2020.

19. Khunti K, Singh AK, Pareek M, Hanif W. Is ethnicity linked to incidence or outcomes of covid-19? *BMJ*. 2020;20(369):m1548. <https://doi.org/10.1136/bmj.m1548>.

20. The OpenSAFELY Collaborative, Williamson E, Walker AJ, et al. OpenSAFELY: factors associated with COVID-19-related hospital death in the linked electronic health records of 17 million adult NHS patients. <https://www.medrxiv.org/content/10.1101/2020.05.06.20092999v1>. Accessed 26 June 2020.

21. British Islamic Medical Association. Ramadan rapid review and recommendations. 2020. <https://britishima.org/ramadan-rapid-review/>. Accessed 8 May 2020.

22. British Thoracic Society. COVID-19: information for the respiratory community. BTS. 2020. <https://brit-thoracic.org.uk/about-us/covid-19-information-for-the-respiratory-community/>. Accessed 8 May 2020.

23. Renal Association. Rapid review guidance for patients intending to fast during the COVID-19 pandemic – CKD, transplants, diabetes and occupational health advice. 2020. <https://renal.org/rapid-review-guidance-patients-tending-fast-covid-19-pandemic-ckd-transplants-diabetes-occupational-health-advice/> Accessed. Accessed 8 May 2020..

24. British Society of Gastroenterology. Rapid evidence review on fasting in Ramadan. BSG. 2020. <https://www.bsg.org.uk/covid-19-advice/rapid-evidence-review-on-fasting-in-ramadan/>. Accessed 8 May 2020.
25. Association of British Clinical Diabetologists. COVID-19 (Coronavirus) information for healthcare professionals. ABCD. 2020. <https://abcd.care/coronavirus>. Accessed 8 May 2020.
26. Royal College of General Practitioners. COVID-19 FAQs from members. RCGP. 2020. <https://www.rcgp.org.uk/covid-19/covid-19-faqs.aspx>. Accessed 8 May 2020.
27. Ghouri N, Gatrads R, Sattar N, Dhami S, Sheikh A. Summer-winter switching of the Ramadan fasts in people with diabetes living in temperate regions. *Diabet Med*. 2012;29(6):696–7.
28. Bravis V, Hui E, Salih S, Mehar S, Hassanein M, Devendra D. Ramadan education and awareness in diabetes (READ) programme for Muslims with type 2 diabetes who fast during Ramadan. *Diabet Med*. 2010;27(3):327–31. <https://doi.org/10.1111/j.1464-5491.2010.02948.x>.
29. Pei G, Zhang Z, Peng J, et al. Renal involvement and early prognosis in patients with COVID-19 pneumonia. *Am Soc Nephrol*. 2020. <https://doi.org/10.1681/ASN.2020030276>.
30. Kalin A, Mahmood A, Waqar S, et al. Is it safe for patients with COVID-19 to fast in Ramadan? Centre for Evidence-Based Medicine. 2020. <https://www.cebm.net/covid-19/is-it-safe-for-patients-with-covid-19-to-fast-in-ramadan/>. Accessed 8 May 2020.
31. Hanif S, Ali SN, Hassanein M, Khunti K, Hanif W. Managing people with diabetes fasting for Ramadan during the COVID-19 pandemic: a South Asian Health Foundation update. *Diabet Med*. 2020. <https://doi.org/10.1111/dme.14312>.
32. Li J, Wang X, Chen J, Zuo X, Zhang H, Deng A. COVID-19 infection may cause ketosis and ketoacidosis. *Diabetes Obes Metab*. 2020. <https://doi.org/10.1111/dom.14057>.

33. Liu J, Li L, Li S, et al. SGLT2 inhibitors and risk of diabetic ketoacidosis in patients with type 2 diabetes: systematic review and meta-analysis of randomized controlled trials. *Diabetes Obes Metab.* 2020. <https://doi.org/10.1111/dom.14075>.
34. Royal College of Emergency Medicine. COVID-19 safety alert, April 2020. [https://www.rcem.ac.uk//docs/RCEM%20Safety%20Flash%20-%20Diabetes%20and%20Covid19%20\(April%202020\).pdf](https://www.rcem.ac.uk//docs/RCEM%20Safety%20Flash%20-%20Diabetes%20and%20Covid19%20(April%202020).pdf). Accessed 6 May 2020.
35. Bode B, Garrett V, Messler J, et al. Glycemic characteristics and clinical outcomes of COVID-19 patients hospitalized in the United States. *J Diabetes Sci Technol.* 2020. <https://doi.org/10.1177/1932296820924469>.
36. How CB, Ming KE, Chin CK. Does religious affiliation influence glycaemic control in primary care patients with type 2 diabetes mellitus? *Ment Health Fam Med.* 2011;8(1):21–8.
